# Supplementary material
Source: Springer Nature journal article supplement (https://www.springermedizin.de/resource/supplementary/12967_2008_321_MOESM4_ESM.pdf/9576194)

VSVG/PGK

rAAV2/2

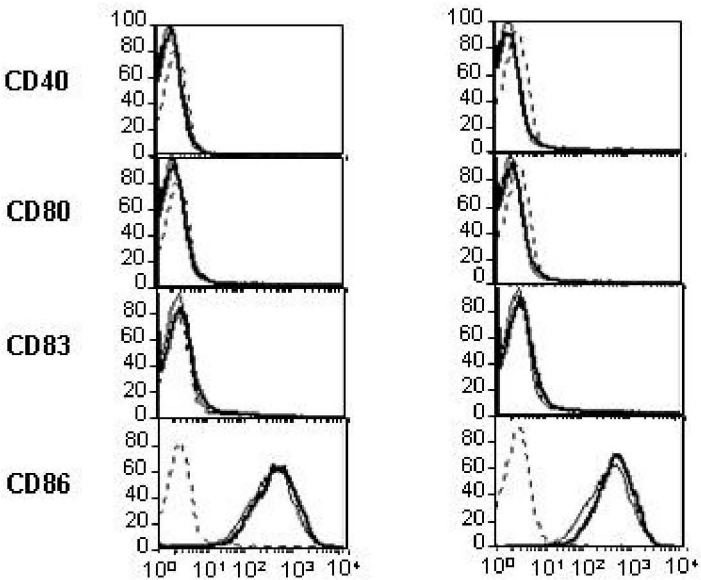

— Non transduced GEN2.2

— Transduced GEN2.2

- - - Isotype matched controls

Supplement: MOESM4 [file 9576194]
